# Supplementary material for: Research on Supply Chain Reverse Customization Equilibrium Considering Government Subsidies: A Case Study of Green Products
Source: Research Square preprint supplement (doi:10.21203/rs.3.rs-6083099/v1), 2025-03-31

**Supplementary Information**

**1.Model proof process**

(1)Proposition 1

Substituting the demand function into equation (1), the profit function of retailers can be summarized as follows:

In the second stage, retailers determine the market selling price ,therefore, the above equation is used to calculate the sales price if the first-order partial derivative of is set to 0, a unique solution can be obtained:

The above results also indicate that retailers have optimal profits. Continuing to substitute the demand function into equation (1), the manufacturer's profit function can be summarized as follows:

take substituting into the above equation, simplify to:

In the first stage, the manufacturer decides on wholesale prices ,therefore, the above equation is used to calculate the wholesale price if the first-order partial derivative of is set to 0, a unique solution can be obtained:

Similarly, the above results indicate that manufacturers have optimal profits. Continue to move substitution in summary, it can be concluded that:

Finally, we will related to by substituting it into the demand function, profit function, and consumer utility function, we can obtain:

Certificate completed.

The proof process for Proposition 2, Proposition 3, Proposition 4, and Proposition 7 is similar to Proposition 1, but the proof is omitted.

(2)Proposition 5

Right about let the first partial derivative of be 0, and simplify it to obtain:

Can obtain a unique solution .

Right about the first partial derivative of can be simplified to obtain:

Since , there exists a unique function about and , such that holds.

Right about let the first partial derivative of be 0, and simplify it to obtain:

The above equation can be regarded as about the univariate quadratic equation. from

It is known that the equation has at least one negative root. According to Veda's theorem it is known that the equation has at least one positive root. Due to therefore, there exists a unique solution.

Similarly, the first-order partial derivatives of with respect to and can be proved. Therefore, there exists a unique value satisfy .

Certificate completed.

The proof process for Proposition 6 is similar, but the proof is omitted.

**2.Paper numerical simulation data and charts**

All numerical simulation images in the paper were generated using EXCEL2010 software, and the source data and images are shown below.

(1)Figure 1: The correlation between product greenness, product green investment level, and manufacturer's equilibrium profit

source data:

| *r* | 1 | 1.05 | 1.1 | 1.15 | 1.2 | 1.25 | 1.3 | 1.35 | 1.4 | 1.45 | … | 2 |
| --- | --- | --- | --- | --- | --- | --- | --- | --- | --- | --- | --- | --- |
| 0.000 | 0.460 | 0.419 | 0.384 | 0.355 | 0.332 | 0.316 | 0.305 | 0.300 | 0.302 | 0.309 | … | 0.790 |
| 0.013 | 0.454 | 0.413 | 0.378 | 0.349 | 0.326 | 0.309 | 0.299 | 0.294 | 0.295 | 0.303 | … | 0.784 |
| 0.025 | 0.448 | 0.407 | 0.372 | 0.343 | 0.320 | 0.303 | 0.292 | 0.288 | 0.289 | 0.297 | … | 0.778 |
| 0.038 | 0.441 | 0.400 | 0.365 | 0.336 | 0.314 | 0.297 | 0.286 | 0.281 | 0.283 | 0.290 | … | 0.771 |
| 0.050 | 0.435 | 0.394 | 0.359 | 0.330 | 0.307 | 0.291 | 0.280 | 0.275 | 0.277 | 0.284 | … | 0.765 |
| 0.063 | 0.429 | 0.388 | 0.353 | 0.324 | 0.301 | 0.284 | 0.274 | 0.269 | 0.270 | 0.278 | … | 0.759 |
| 0.075 | 0.423 | 0.382 | 0.347 | 0.318 | 0.295 | 0.278 | 0.267 | 0.263 | 0.264 | 0.272 | … | 0.753 |
| 0.088 | 0.416 | 0.375 | 0.340 | 0.311 | 0.289 | 0.272 | 0.261 | 0.256 | 0.258 | 0.265 | … | 0.746 |
| 0.100 | 0.410 | 0.369 | 0.334 | 0.305 | 0.282 | 0.266 | 0.255 | 0.250 | 0.252 | 0.259 | … | 0.740 |
| 0.113 | 0.404 | 0.363 | 0.328 | 0.299 | 0.276 | 0.259 | 0.249 | 0.244 | 0.245 | 0.253 | … | 0.734 |
| … | … | … | … | … | … | … | … | … | … | … | … | … |
| 0.25 | 0.335 | 0.294 | 0.259 | 0.230 | 0.207 | 0.191 | 0.180 | 0.175 | 0.177 | 0.184 | … | 0.665 |

Figure:


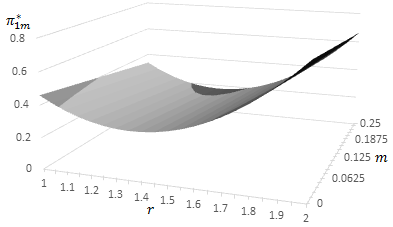


(2)Figure 2: Analysis of the impact of obtaining the happiness coefficient on the degree of reverse customization effort and manufacturer profit under equilibrium

source data:

|  |  |  |
| --- | --- | --- |
| 1 | 0.050 | 3.135 |
| 1.025 | 0.061 | 3.033 |
| 1.05 | 0.073 | 2.959 |
| 1.075 | 0.088 | 2.912 |
| 1.1 | 0.104 | 2.889 |
| 1.125 | 0.124 | 2.889 |
| 1.15 | 0.149 | 2.909 |
| 1.175 | 0.178 | 2.948 |
| 1.2 | 0.214 | 3.004 |
| 1.225 | 0.261 | 3.078 |
| 1.25 | 0.321 | 3.166 |
| 1.275 | 0.404 | 3.270 |
| 1.3 | 0.524 | 3.387 |
| 1.325 | 0.712 | 3.517 |
| 1.35 | 1.046 | 3.659 |
| 1.375 | 1.807 | 3.813 |
| 1.4 | 5.250 | 3.978 |
| 1.425 | -7.270 | 4.154 |
| 1.45 | -2.299 | 4.340 |
| 1.475 | -1.417 | 4.536 |
| 1.5 | -1.050 | 4.741 |

Figure:


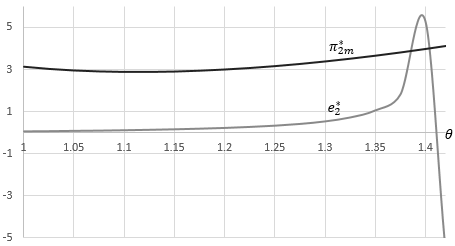


(3)Figure 3: Analysis of factors influencing consumer equilibrium utility

source data:

|  | 1 | 1.25 | 1.5 | 1.75 | 2 | 2.25 | 2.5 | 2.75 | 3 | 3.25 | 3.5 | 3.75 | 4 |
| --- | --- | --- | --- | --- | --- | --- | --- | --- | --- | --- | --- | --- | --- |
| 0 | 0.180 | 1.149 | 1.968 | 2.634 | 3.150 | 3.514 | 3.728 | 3.789 | 3.700 | 3.459 | 3.068 | 2.524 | 1.830 |
| 0.05 | 0.488 | 1.457 | 2.275 | 2.942 | 3.458 | 3.822 | 4.035 | 4.097 | 4.008 | 3.767 | 3.375 | 2.832 | 2.138 |
| 0.1 | 0.750 | 1.719 | 2.538 | 3.204 | 3.720 | 4.084 | 4.298 | 4.359 | 4.270 | 4.029 | 3.638 | 3.094 | 2.400 |
| 0.15 | 0.968 | 1.937 | 2.755 | 3.422 | 3.938 | 4.302 | 4.515 | 4.577 | 4.488 | 4.247 | 3.855 | 3.312 | 2.618 |
| 0.2 | 1.140 | 2.109 | 2.928 | 3.594 | 4.110 | 4.474 | 4.688 | 4.749 | 4.660 | 4.419 | 4.028 | 3.484 | 2.790 |
| 0.25 | 1.268 | 2.237 | 3.055 | 3.722 | 4.238 | 4.602 | 4.815 | 4.877 | 4.788 | 4.547 | 4.155 | 3.612 | 2.918 |
| 0.3 | 1.350 | 2.319 | 3.138 | 3.804 | 4.320 | 4.684 | 4.898 | 4.959 | 4.870 | 4.629 | 4.238 | 3.694 | 3.000 |
| 0.35 | 1.388 | 2.357 | 3.175 | 3.842 | 4.358 | 4.722 | 4.935 | 4.997 | 4.908 | 4.667 | 4.275 | 3.732 | 3.038 |
| 0.4 | 1.380 | 2.349 | 3.168 | 3.834 | 4.350 | 4.714 | 4.928 | 4.989 | 4.900 | 4.659 | 4.268 | 3.724 | 3.030 |
| 0.45 | 1.328 | 2.297 | 3.115 | 3.782 | 4.298 | 4.662 | 4.875 | 4.937 | 4.848 | 4.607 | 4.215 | 3.672 | 2.978 |
| 0.5 | 1.230 | 2.199 | 3.018 | 3.684 | 4.200 | 4.564 | 4.778 | 4.839 | 4.750 | 4.509 | 4.118 | 3.574 | 2.880 |
| 0.55 | 1.088 | 2.057 | 2.875 | 3.542 | 4.058 | 4.422 | 4.635 | 4.697 | 4.608 | 4.367 | 3.975 | 3.432 | 2.738 |
| 0.6 | 0.900 | 1.869 | 2.688 | 3.354 | 3.870 | 4.234 | 4.448 | 4.509 | 4.420 | 4.179 | 3.788 | 3.244 | 2.550 |
| 0.65 | 0.668 | 1.637 | 2.455 | 3.122 | 3.638 | 4.002 | 4.215 | 4.277 | 4.188 | 3.947 | 3.555 | 3.012 | 2.318 |
| 0.7 | 0.390 | 1.359 | 2.178 | 2.844 | 3.360 | 3.724 | 3.938 | 3.999 | 3.910 | 3.669 | 3.278 | 2.734 | 2.040 |
| 0.75 | 0.067 | 1.037 | 1.855 | 2.522 | 3.038 | 3.402 | 3.615 | 3.677 | 3.588 | 3.347 | 2.955 | 2.412 | 1.718 |
| 0.8 | 0.300 | 0.669 | 1.488 | 2.154 | 2.670 | 3.034 | 3.248 | 3.309 | 3.220 | 2.979 | 2.588 | 2.044 | 1.350 |
| 0.85 | 0.713 | 0.257 | 1.075 | 1.742 | 2.258 | 2.622 | 2.835 | 2.897 | 2.808 | 2.567 | 2.175 | 1.632 | 0.937 |
| 0.9 | 1.170 | 0.201 | 0.617 | 1.284 | 1.800 | 2.164 | 2.378 | 2.439 | 2.350 | 2.109 | 1.718 | 1.174 | 0.480 |
| 0.95 | 1.673 | 0.703 | 0.115 | 0.782 | 1.298 | 1.662 | 1.875 | 1.937 | 1.848 | 1.607 | 1.215 | 0.672 | 0.023 |
| 1 | 2.220 | 1.251 | 0.433 | 0.234 | 0.750 | 1.114 | 1.328 | 1.389 | 1.300 | 1.059 | 0.667 | 0.124 | 0.570 |

Figure:


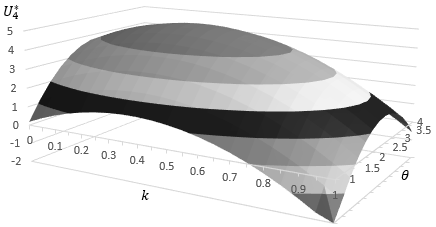


(4)Figure 4: Analysis of Factors Influencing Equilibrium Profit of Manufacturers

source data:

| Function Relationship 1 | | Function Relationship 2 | | Function Relationship 3 | |
| --- | --- | --- | --- | --- | --- |
|  |  |  |  |  |  |
| 1.76 | 0 | 3.75 | 1 | 2.3 | 0 |
| 2.2 | 0.05 | 3.798 | 1.05 | 1.916 | 0.05 |
| 2.56 | 0.1 | 3.84 | 1.1 | 1.564 | 0.1 |
| 2.84 | 0.15 | 3.878 | 1.15 | 1.244 | 0.15 |
| 3.04 | 0.2 | 3.91 | 1.2 | 0.956 | 0.2 |
| 3.16 | 0.25 | 3.938 | 1.25 | 0.7 | 0.25 |
| 3.2 | 0.3 | 3.96 | 1.3 | 0.476 | 0.3 |
| 3.16 | 0.35 | 3.978 | 1.35 | 0.284 | 0.35 |
| 3.04 | 0.4 | 3.99 | 1.4 | 0.124 | 0.4 |
| 2.84 | 0.45 | 3.998 | 1.45 | -0.004 | 0.45 |
| 2.56 | 0.5 | 4 | 1.5 | -0.1 | 0.5 |
| 2.2 | 0.55 | 3.998 | 1.55 | -0.164 | 0.55 |
| 1.76 | 0.6 | 3.99 | 1.6 | -0.196 | 0.6 |
| 1.24 | 0.65 | 3.978 | 1.65 | -0.196 | 0.65 |
| 0.64 | 0.7 | 3.96 | 1.7 | -0.164 | 0.7 |
| -0.04 | 0.75 | 3.938 | 1.75 | -0.1 | 0.75 |
| -0.8 | 0.8 | 3.91 | 1.8 | -0.004 | 0.8 |
| -1.64 | 0.85 | 3.878 | 1.85 | 0.124 | 0.85 |
| -2.56 | 0.9 | 3.84 | 1.9 | 0.284 | 0.9 |
| -3.56 | 0.95 | 3.798 | 1.95 | 0.476 | 0.95 |
| -4.64 | 1 | 3.75 | 2 | 0.7 | 1 |
|  |  | 3.698 | 2.05 | 0.956 | 1.05 |
|  |  | 3.64 | 2.1 | 1.244 | 1.1 |
|  |  | 3.578 | 2.15 | 1.564 | 1.15 |
|  |  | 3.51 | 2.2 | 1.916 | 1.2 |
|  |  | 3.438 | 2.25 | 2.3 | 1.25 |
|  |  | 3.36 | 2.3 | 2.716 | 1.3 |
|  |  | 3.278 | 2.35 | 3.164 | 1.35 |
|  |  | 3.19 | 2.4 | 3.644 | 1.4 |
|  |  | 3.098 | 2.45 | 4.156 | 1.45 |
|  |  | 3 | 2.5 | 4.7 | 1.5 |
|  |  | 2.898 | 2.55 | 5.276 | 1.55 |
|  |  | 2.79 | 2.6 | 5.884 | 1.6 |
|  |  | 2.678 | 2.65 | 6.524 | 1.65 |
|  |  | 2.56 | 2.7 | 7.196 | 1.7 |
|  |  | 2.438 | 2.75 | 7.9 | 1.75 |
|  |  | 2.31 | 2.8 | 8.636 | 1.8 |
|  |  | 2.178 | 2.85 | 9.404 | 1.85 |
|  |  | 2.04 | 2.9 | 10.204 | 1.9 |

Figure:


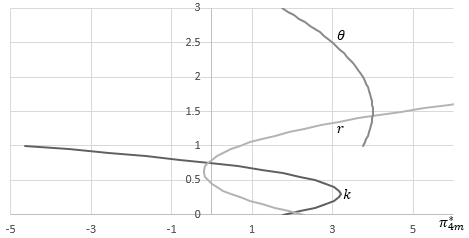


(5)Figure 5: The impact of the proportion of costs borne by retailers on the equilibrium profit of supply chain node enterprises

source data:

|  |  |  |
| --- | --- | --- |
| 0 | 1.920 | 2.458 |
| 0.05 | 2.219 | 2.831 |
| 0.1 | 2.464 | 3.160 |
| 0.15 | 2.655 | 3.443 |
| 0.2 | 2.791 | 3.682 |
| 0.25 | 2.873 | 3.875 |
| 0.3 | 2.900 | 4.024 |
| 0.35 | 2.873 | 4.127 |
| 0.4 | 2.791 | 4.186 |
| 0.45 | 2.655 | 4.199 |
| 0.5 | 2.464 | 4.168 |
| 0.55 | 2.219 | 4.091 |
| 0.6 | 1.920 | 3.970 |
| 0.65 | 1.566 | 3.803 |
| 0.7 | 1.158 | 3.592 |
| 0.75 | 0.695 | 3.335 |
| 0.8 | 0.177 | 3.034 |
| 0.85 | -0.394 | 2.687 |
| 0.9 | -1.020 | 2.296 |
| 0.95 | -1.701 | 1.859 |
| 1 | -2.436 | 1.378 |

Figure:


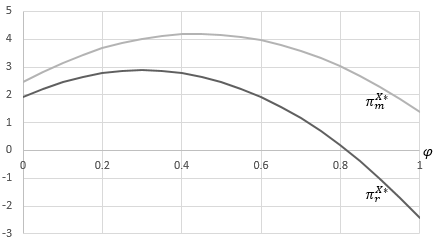

Supplement: Supplementary file 1 [file 469e77d4b7d91d53eda8f4a4.docx]
